# Supplementary material for: A retrospective study of treatment outcomes and safety in patients receiving long-term relugolix administration
Source: Research Square preprint supplement (doi:10.21203/rs.3.rs-7229530/v1), 2025-09-23
Supplement: Supplementary file 1 [file 9f464a3d57dc52cfcee464f0.xlsx]

## Sheet: Sheet2
days	age	height	kg	BMI	gravidity	parity	total_Myo	Int	Sero	Muco	FST_L	FST_W	FST_H	FST_MaxD	FST_volume	cure_L	cure_W	cure_H	cure_MaxD	cure_volume	MRItoMRI	Vlm_Rdc	MaxD_Rdc	Rdc_perD	E2	Hb	CA125
1030	46				0	0	3	3	0	0	166	201	221	126	2927.26	120	142	172	110	1405.11	370	51.999	27.7108	0.140538		8.2	104
938	25	171	48.1	16.4495	0	0	11	10	0	1	20	90	61	60	172.276	67	92	58	66	184.188	1288	-6.91439	-235	-0.00536832	104	8	7
665	49	163	59.4	22.3569	4	3	3	2	0	1															0	10.7
630	47				0	0	6	4	2	0	56	105	117	89	571.83										123	5.1
620	48				1	1	6	4	2	0	71	115	94	90	508.827	80	101	103	111	603.925	829	-18.6898	-12.6761	-0.022545	240	10.3	177
554	46	163.3	48.7	18.2623	0	0	6	4	2	0	44	79	85	63	221.253										284	10.4	44
532	36	159.7	54.4	21.3299	0	0	4	4	0	0	82	98	117	85	509.721	79	106	113	92	576.333	836	-13.0684	3.65854	-0.0156321	203	9.3	20
522	47	164	58	21.5645	0	0	5	0	4	1	49	100	81	59	249.942	45	87	85	60	232.055	404	7.15631	8.16327	0.0177136	43	6.6	86
510	46				0	0	3	1	2	0	178	175	189	97	1677.93	155	151	153	110	1329.12	1040	20.7883	12.9213	0.0199887	230	10.1	13
487	50	153.5	65	27.5865	5	3	8	7	0	1	126	126	110	96	695.883	74	152	96	77	587.634	1049	15.5556	41.2698	0.0148289	191	10.9	37
480	34				0	0	4	4	0	0	34	72	63	63	149.457	63	98	78	80	319.825	1484	-113.992	-85.2941	-0.0768139	99	11.9	239
470	38				0	0	5	4	1	0	30	71	75	55	153.174	30	67	61	71	151.763	189	0.921212	0	0.00487414	91	12.5	84
460	39				0	0	3	2	1	0	86	131	120	92	756.384	77	92	97	84	392.049	189	48.1679	10.4651	0.254857	209	12.9
440	35				0	0	5	4	1	0	42	87	99	72	324.331	34	90	86	67	271.217	395	16.3764	19.0476	0.0414593	180	11.3	216
430	49	160.6	45.3	17.5633	0	0	12	10	2	0	60	127	107	101	717.812	57	100	110	76	437.228	553	39.0888	5	0.0706849	800	5.8	218
424	33	158	49	19.6283	1	0	2	0	1	1	22	72	56	46	97.0019	23	63	65	52	111.368	1419	-14.8098	-4.54545	-0.0104368	418	12.3	45
420	48				0	0	6	6	0	0	85	106	109	93	561.975	68	97	111	89	501.172	1057	10.8196	20	0.0102361	237	7.3
420	31	161.2	61.8	23.7825	0	0	2	1	1	0	40	107	62	60	208.175	59	107	78	62	270.627	1641	-30	-47.5	-0.0182815		11.1
370	46				0	0	16	12	2	2	83	168	125	113	1241.08	77	217	182	84	1735.05	2667	-39.8018	7.22892	-0.0149238	58	7.5	15
370	39	150	50.6	22.4889	1	0	1	1	0	0	63	115	119	83	594.052	51	86	89	57	228.173	598	61.5903	9.52381	0.102994	0	10.1	380
360	46	159	56.7	22.4279	2	2	6	4	1	1						42	61	78	57	141.841					53	6.6	104
360	48				0	0	31	29	2	0	41	122	116	84	621.726	34	79	81	68	227.574	638	63.3964	17.0732	0.0993674	157	8	13
360	45				0	0	12	9	2	1	80	135	120	98	830.315	75	121	100	94	594.86	970	28.3573	6.25	0.0292343
355	49	161.2	82.7	31.8255	1	0	3	2	1	0	57	155	163	102	1347.79	47	166	122	125	1323.97	609	1.76676	17.5439	0.00290109	88	8.2	426
355	34	159.2	59.1	23.3185	0	0	7	4	2	1	40	113	90	68	361.686										828	7.2	242
352	43	157.1	73.5	29.7807	0	0	1	1	0	0	133	100	133	87	605.163	121	85	98	78	339.814	378	43.8475	9.02256	0.115999		6.4	89
345	52	158.6	57.6	22.899	2	2	14	14	0	0	137	184	194	97	1810.89	146	173	190	95	1633.15	623	9.81548	-6.56934	0.0157552	40.7	10.7
327	33	162.6	53.2	20.122	0	0	3	3	0	0	64	109	72	95	389.928	68	84	77	96	324.745	664	16.7166	-6.25	0.0251755	248	10.7	18
320	40	157	53.1	21.5425	0	0	5	5	0	0	95	113	111	99	649.439	88	113	92	99	538.274	1647	17.1171	7.36842	0.0103929	191	12.5	36
315	38	151	51.7	22.6744	0	0	2	2	0	0	156	150	103	120	969.642	141	122	99	114	720.115	181	25.734	9.61538	0.142177		9.8
300	35	159.6	52.5	20.6107	0	0	8	6	2	0	89	149	137	92	982.192	81	152	121	92	884.949	205	9.90055	8.98876	0.0482954	98	8.4
284	42	163.3	75	28.1248	0	0	7	6	1	0	53	123	92	92	544.481										333	9.2	24
283	45	160.7	67.6	26.1767	0	0	2	2	0	0	82	154	103	85	705.145	91	105	100	81	444.812	122	36.9192	-10.9756	0.302616		5.5	20
280	46	172	59	19.9432	0	0	8	8	0	0	92	143	141	107	1128.34	61	116	97	89	523.747	1092	53.5826	33.6957	0.0490683	184	9.9
270	41	166.2	62.6	22.6627	0	0	1	1	0	0	27	45	45	37	39.1858	45	113	103	102	620.894	690	-1484.49	-66.6667	-2.15143	225	10.5	172
270	50				3	0	1	1	0	0	45	74	69	60	160.226										104	13	94
265	29	157.3	47.8	19.3184	0	0	8	7	1	0	86	105	100	102	560.133	96	131	93	102	649.914	365	-16.0286	-11.6279	-0.0439139	284	10.3
265	38	153.9	46.6	19.6747	0	0	1	0	0	1	43	61	62	56	110.767											11.4	17
255	36	154.3	37.1	15.5827	0	0	3	2	1	0	128	111	113	107	701.919	68	64	86	57	164.08	139	76.6241	46.875	0.551253	230	10.3	176
253	43	161	79.6	30.7087	0	0	21	18	2	1	102	157	133	138	1507.07	104	154	164	121	1598.28	210	-6.05217	-1.96078	-0.0288199	334	10.3	100
250	46	161		0	2	2	1	1	0	0	93	136	112	104	828.499	91	109	99	102	575.657	184	30.5181	2.15054	0.165859	7.1	6.7	44
245	48	144.8	87	41.4937	0	0	6	4	2	0	98	150	218	99	1693.11	86	118	203	81	1014.76	318	40.0651	12.2449	0.125991	0	13.6	39
242	29	153.6	68.3	28.9493	0	0	2	2	0	0						92	110	108	87	540.552					0	8.2	20
240	43	157.5	58.4	23.5425	0	0	3	3	0	0	126	180	130	104	1272.77	125	143	122	104	948.923	260	25.4444	0.793651	0.0978632	185	12.1	8
240	47	152.1	68.1	29.4367	3	2	1	1	0	0	66	87	77	74	259.265	57	77	68	66	180.736	161	30.2889	13.6364	0.18813		13.4
239	35	152.2	46	19.8577	0	0	1	1	0	0	161	166	149	88	1138.36	112	118	110	74	502.352	203	55.8705	30.4348	0.275224		10.8
236	55	156.8	51.6	20.9873	1	1	3	3	0	0	45	70	58	65	138.02											11.8
234	43	164.5	52	19.2164	0	0	12	8	2	2	75	135	121	107	914.123	72	155	145	102	1198.95	825	-31.1587	4	-0.0377681		6.7	113
230	48	169	62.1	21.7429	0	0	10	9	0	1	51	125	102	101	673.493	41	124	101	98	641.905	251	4.6902	19.6078	0.018686		9.9	31
230	49	166	65	23.5883	0	0	7	6	1	0	128	182	130	148	1831.38	97	157	137	68	764.946	245	58.2311	24.2188	0.237678	63	8.3	18
230	48	165	57	20.9366	0	0	5	5	0	0	100	167	196	91	1557.81	75	124	127	98	807.148	247	48.1871	25	0.19509	145	11	11
223	45	156	76.1	31.2705	0	0	6	5	0	1	48	65	61	61	126.495	46	80	69	69	199.2	1129	-57.4763	4.16667	-0.050909	30	8.9	33
218	33	150.6	39.7	17.5041	0	0	4	3	1	0	74	84	70	74	227.568	74	61	57	60	109.108	278	52.0546	0	0.187247	119	11.4
216	47	155.5	51.6	21.3397	0	0	6	4	2	0	96	81	132	118	659.846	80	59	106	108	353.251	330	46.4646	16.6667	0.140802		10.5
210	49				1	1	16	15	1	0	48	107	118	94	620.719	36	83	82	71	252.727	337	59.2848	25	0.175919	233	6	18
210	42				0	0	15	15	0	0	51	109	102	113	657.063	53	129	103	103	715.757	378	-8.9329	-3.92157	-0.023632	278	8.7	16
210	37	163	54	20.3244	0	0											61	65	56	116.127					158	5.4	713
210	47	155	57.4	23.8918	0	0	5	5	0	0	70	103	113	96	584.371	74	79	96	85	337.147	82	42.306	-5.71429	0.515927	306	12.1	90
210	37	170	59.3	20.519	0	0	2	1	1	0	100	93	96	81	378.217	98	89	95	78	344.913	154	8.80542	2	0.0571781		12.7	17
210	40				0	0	15	14	1	0	66	118	107	101	666.943	54	66	91	83	260.714	119	60.909	18.1818	0.511841	69	11
203	46	153	61.1	26.1011	3	1	2	2	0	0	37	95	99	105	516.476	22	73	81	69	213.382	238	58.6849	40.5405	0.246575		9.6
200	48	152	46	19.91			11	6	3	2	102	108	95	90	482.938	89	94	85	101	422.056	166	12.6067	12.7451	0.0759438	71	9.2	10
200	42	169	67.2	23.5286	2	1	7	6	0	1	83	128	103	106	730.895										81	11.3	46
200	25	158.6	54.6	21.7063	0	0	1	0	0	1	212	186	182	74	1310.14	202	166	145	79	994.5	98	24.0921	4.71698	0.245837	49	12.7	20
